# Supplementary material
Source: PubMed Central journal article supplement (PMC3021625)

## Supporting Information

### A Simple and Convenient G-quadruplex-Based Turn-On Fluorescence Assay for 3' → 5' Exonuclease Activity

Chung-Hang Leung,<sup>\*,‡</sup> Daniel Shiu-Hin Chan,<sup>§</sup> Bradley Yat-Wah Man,<sup>§</sup> Chuan-Jen Wang,<sup>†</sup> Wing Lam,<sup>†</sup>  
Yung-Chi Cheng,<sup>†</sup> Wang-Fun Fong,<sup>‡</sup> Wen-Luan Wendy Hsiao,<sup>‡</sup> and Dik-Lung Ma<sup>\*,§</sup>

<sup>‡</sup>*School of Chinese Medicine, Hong Kong Baptist University, Kowloon Tong, Hong Kong, China,* <sup>§</sup>*Department of Chemistry, Hong Kong Baptist University, Kowloon Tong, Hong Kong, China,* and <sup>†</sup>*Department of Pharmacology, Yale University School of Medicine, New Haven, Connecticut 06520, U.S.A.*

Email: edmondma@hkbu.edu.hk; duncanl@hkbu.edu.hk

**Materials and cell lines.** Exonuclease III, exonuclease I and T7 exonuclease and their respective buffers were obtained from New England Biolabs (Beverly, MA, USA). DNase I, its respective buffer and crystal violet were obtained from Sigma-Aldrich (St. Louis, MO, USA). DNA oligomers were obtained from Tech Dragon Limited (Hong Kong). The sequences for the oligomers are:

G<sub>55</sub>: [5'-AGGGTTAGGGTTAGGGTTAGGGCAGAAGGATAACCCTAACCTAACCTAACCT-3']

G<sub>55m</sub>: [5'-AAGGTTAGCGTTAGGATTACGGCAGAAGGATAACCGTAATCCTAACGCTAACCTT-3']

The oligonucleotides were hybridized by annealing at 95 °C for 10 min in 10 mM sodium phosphate, 1 mM EDTA and 46.25 mM sodium chloride, pH 7.4 and slowly cooling to 20 °C at 0.1 °C/s, followed by incubation at 20 °C for a further 30 min.

**Expression and purification of recombinant human TREX1 protein.** Human TREX1 encoding sequence was cloned for the expression of TREX1 protein with 314 amino acid residues. The recombinant protein bearing His-tag was expressed in *Escherichia coli* and purified using Ni-NTA column from Qiagen (Chatsworth, CA, USA). Further details can be found in Reference 14b.

**Emission measurement.** Emission spectra were recorded on a SPEX Fluorolog-2 Model fluorescence spectrophotometer. Oligonucleotide G<sub>55</sub> (15 μM) was incubated at 37 °C for 30 min in a reaction volume of 16.7 μL with the indicated concentrations of enzyme (buffer): exonuclease III (10 mM Bis-Tris-Propane-HCl, 10 mM MgCl<sub>2</sub>, 1 mM dithiothreitol, pH 7.0); exonuclease I (67 mM Glycine-KOH, 6.7 mM MgCl<sub>2</sub>, 10 mM 2-mercaptoethanol, pH 9.5); T7 exonuclease (20 mM Tris-acetate, 50 mM potassium acetate, 10 mM magnesium acetate, 1 mM dithiothreitol, pH 7.9); DNase I (10 mM Tris-HCl, 2.5 mM MgCl<sub>2</sub>, 0.5 mM CaCl<sub>2</sub>, pH 7.6). The oligonucleotide digestion reactions were quenched by the addition of EDTA at a final concentration of 20 mM, and were diluted to 1 mL with Tris buffer (10 mM Tris-HCl, pH 7.5) containing CV (1 μM) and KCl (10 mM). Final

oligonucleotide concentration = 0.25  $\mu$ M. The emission spectra were recorded in the 600–750 nm range, after equilibration at room temperature for 20 min. Excitation wavelength = 580 nm.

High-throughput emission measurements were recorded on a Tecan Infinite 200 multimode microplate reader.  $G_{55}$  (1  $\mu$ M) was incubated at 37 °C for 30 min in a 100  $\mu$ L reaction volume in a 96-well black microplate with exonuclease III (200 U/ml) in buffer solution (10 mM Bis-Tris-Propane-HCl, 10 mM  $MgCl_2$ , 1 mM dithiothreitol, pH 7.0). To each well was added 100  $\mu$ L of Tris buffer solution (20 mM, pH 7.5) containing EDTA (40 mM), KCl (20 mM) and CV (4  $\mu$ M). Final [CV] = 2  $\mu$ M; final [ $G_{55}$ ] = 0.5  $\mu$ M. The emission intensity at  $\lambda$  = 635 nm was recorded after equilibration at room temperature for 20 min. For real-time measurement of ExoIII activity,  $G_{55}$  (0.5  $\mu$ M) was incubated with the indicated concentrations of ExoIII in buffer solution (10 mM Bis-Tris-Propane-HCl, 10 mM  $MgCl_2$ , 1 mM dithiothreitol, pH 7.0) containing CV (2  $\mu$ M) and KCl (10 mM) at 37 °C. For real-time measurement of TREX1 activity,  $G_{55}$  (0.5  $\mu$ M) was incubated with the indicated concentrations of TREX1 in buffer solution (10 mM Tris-HCl, 10 mM  $MgCl_2$ , 1 mM dithiothreitol, pH 7.0) containing CV (2  $\mu$ M) and KCl (10 mM) at 25 °C. The emission intensity of each well at 635 nm was recorded every 1 min. Excitation wavelength = 590 nm.

**Circular dichroism measurement.** CD spectra were recorded on a spectropolarimeter at room temperature under an atmosphere of nitrogen.  $G_{55}$  (15  $\mu$ M) was incubated at 37 °C for 30 min with the exonuclease III (200 U/ml) in buffer (10 mM Bis-Tris-Propane-HCl, 10 mM  $MgCl_2$ , 1 mM dithiothreitol, pH 7.0). The oligonucleotide digestion reactions were diluted 3-fold into Tris buffer (10 mM Tris-HCl, 10 mM KCl, pH 7.5). Final oligonucleotide concentration = 5  $\mu$ M. Spectra were recorded in the 200–320 nm range in 0.5 mm pathlength cuvettes after equilibration at room temperature for 20 min, using a scanning speed of 100 nm/min, a response time of 1 s and a bandwidth of 0.2 nm. Spectra were averaged from 3 scans.

For the real-time measurement, the oligonucleotides (1.5  $\mu$ M) were incubated with exonuclease III (75 U/ml) at 37 °C in buffer (10 mM Bis-Tris-Propane-HCl, 10 mM  $MgCl_2$ , 1 mM dithiothreitol, 10 mM KCl, pH 7.0). Scans were recorded every 1 min using the parameters above.

**Gel electrophoresis.** 5 mL of 30% acrylamide solution, 0.2 mL of KCl (1 M), 1 mL of 10  $\times$  TBE buffer and 3.8 mL of  $H_2O$  was mixed carefully to avoid formation of bubbles. 5  $\mu$ L of TEMED and 80  $\mu$ L of 10% APS was added to the mixture, which was poured into the glass panels and allowed to set at room temperature for 30 min. For the hydrolysis assay, the oligonucleotide (1.5  $\mu$ M) was incubated with ExoIII (75 U/ml) in buffer (10 mM Bis-Tris-Propane-HCl, 10 mM  $MgCl_2$ , 1 mM dithiothreitol, 10 mM KCl, pH 7.0) at 37 °C for the indicated time. The reactions were quenched by the addition of 20 mM EDTA and 10 mM KCl. The digestion mixture was loaded onto the gel and electrophoresed using 1 $\times$  TBE containing 10 mM KCl, and visualized using SYBR Green I.

**Figure S1.** Design of G<sub>55</sub> oligonucleotide. a) The G<sub>55</sub> oligonucleotide sequence comprises a telomeric G-quadruplex sequence and the complimentary cytosine-rich sequence connected by a flexible linker. b) The oligonucleotide is reannealed by heating at 100 °C for 10 min followed by slow cooling to form the stem-loop DNA secondary structure.

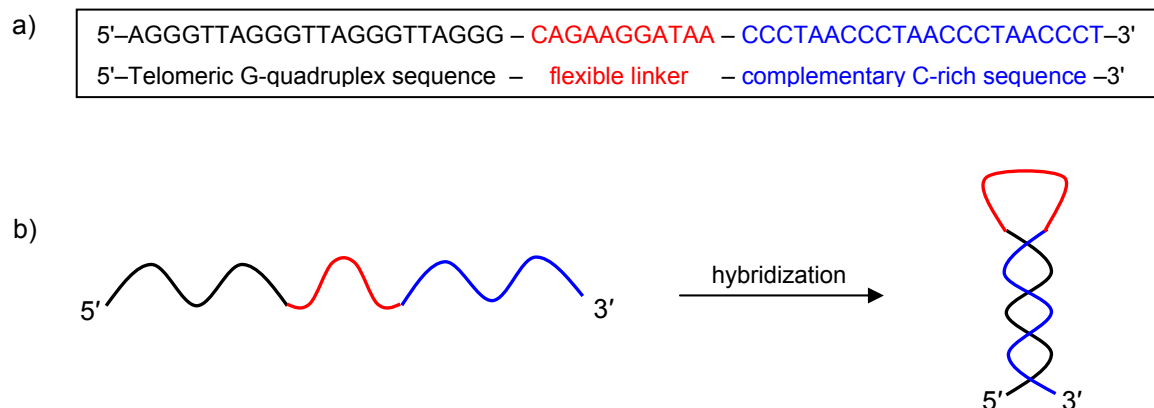

**Figure S2.** Fluorescence response of CV (1  $\mu$ M) in the presence of oligonucleotide G<sub>55</sub> or G<sub>55m</sub> (0.25  $\mu$ M). G<sub>55</sub> or G<sub>55m</sub> (15  $\mu$ M) was incubated with ExoIII (2000 U/mL) 37 °C for 30 min

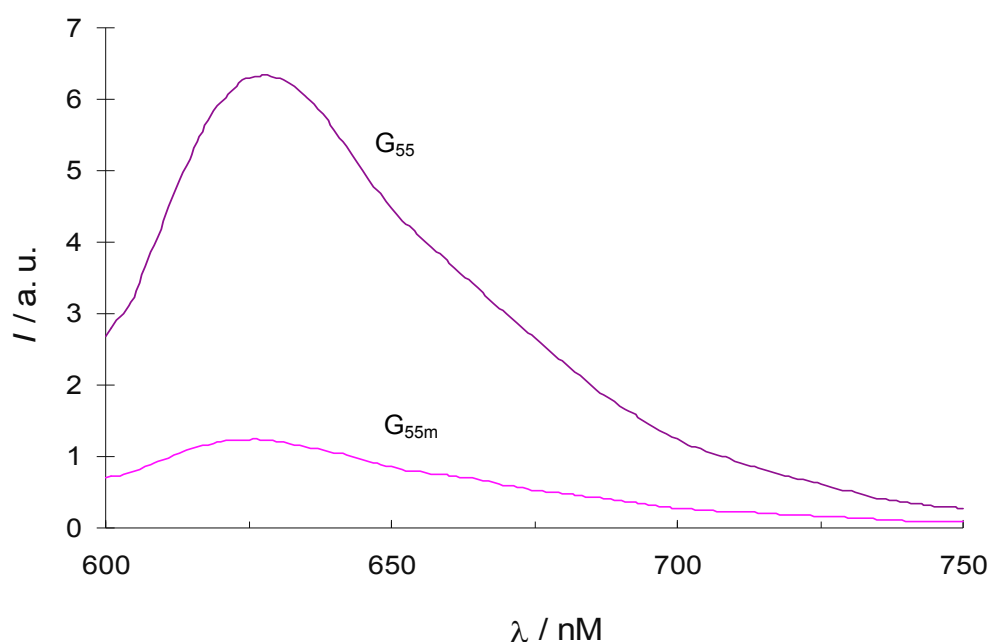

**Figure S3.** Fluorescence response of CV (1  $\mu\text{M}$ ) in the presence of oligonucleotide  $G_{55}$  (0.25  $\mu\text{M}$ ).  $G_{55}$  (15  $\mu\text{M}$ ) was previously incubated with ExoIII ( $2 \times 10^3$  U/mL) or heat-inactivated ExoIII ( $2 \times 10^3$  U/mL) 37  $^{\circ}\text{C}$  for 10 min. ExoIII was inactivated by heating at 100  $^{\circ}\text{C}$  for 20 min.

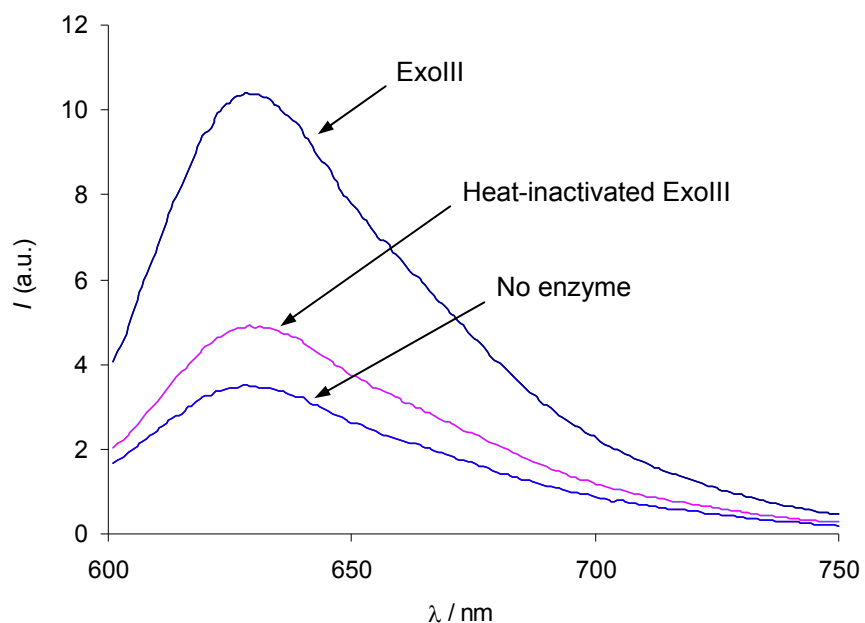

**Figure S4.** Fluorescence response of CV (1  $\mu\text{M}$ ) in the presence or absence of ExoIII (33 U/mL).

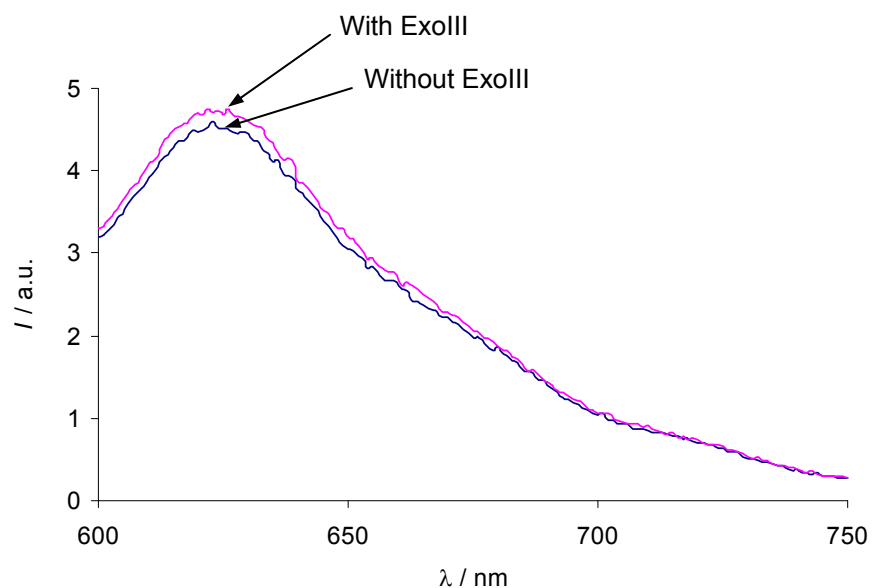

**Figure S5.** Real-time CD measurement of indicated oligonucleotide (1.5  $\mu$ M) with exonuclease III (75 U/ml) at 37 °C in buffer (10 mM Bis-Tris-Propane-HCl, 10 mM MgCl<sub>2</sub>, 1 mM dithiothreitol, 10 mM KCl, pH 7.0). a) G<sub>55</sub>. Inset: CD intensity at 268 / 295 nm vs. time. b) G<sub>55m</sub>.

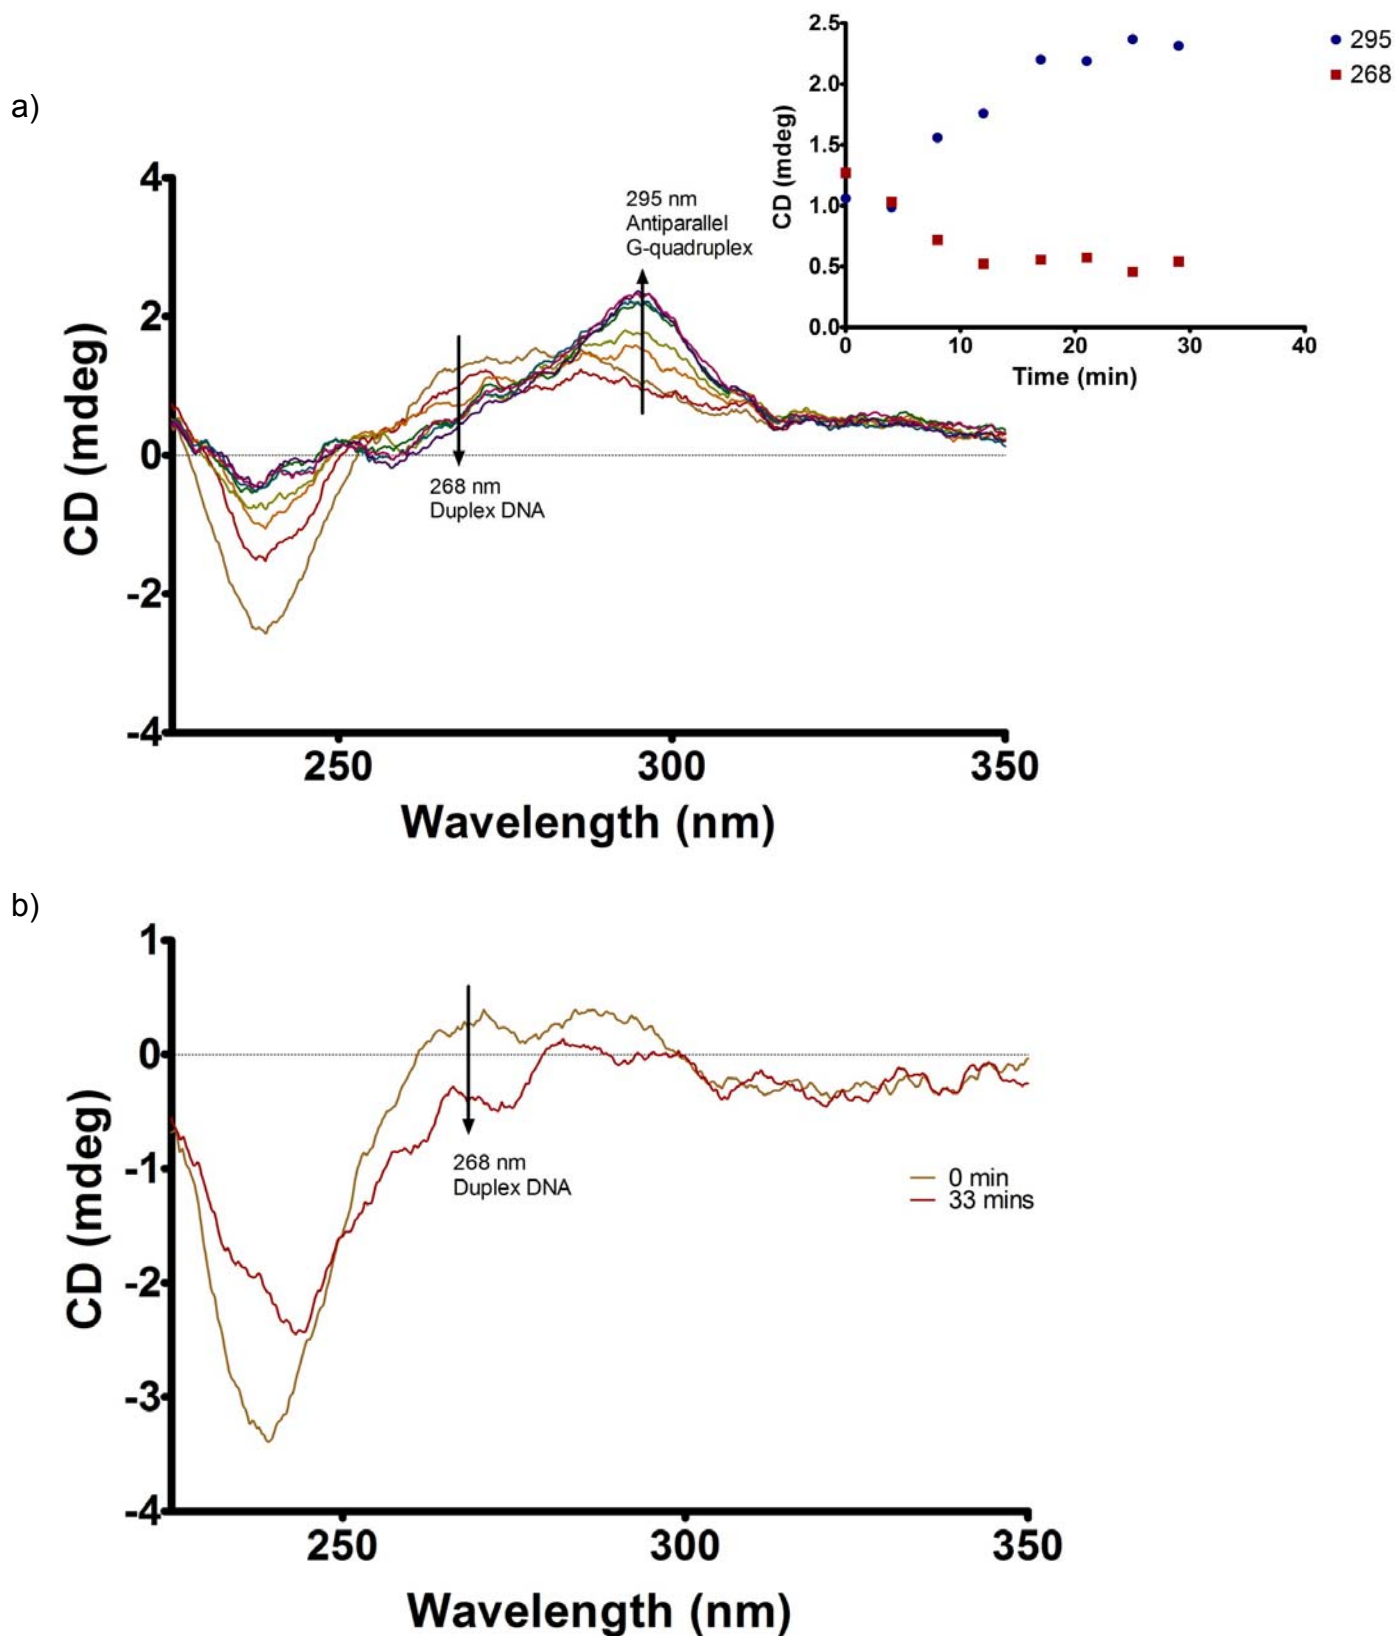

**Figure S6.** Gel electrophoresis of DNA hydrolysis samples. G<sub>55</sub> (1.5  $\mu$ M) was incubated with ExoIII (75 U/ml) in buffer (10 mM Bis-Tris-Propane-HCl, 10 mM MgCl<sub>2</sub>, 1 mM dithiothreitol, 10 mM KCl, pH 7.0) at 37 °C for the indicated time, then were quenched with 20 mM EDTA and 10 mM KCl. The gel was visualized with SYBR Green. The positive control contains the expected hydrolysis product: Quad = [5'-AGGGTTAGGGTTAGGGTTAGGGCAGAAGGATAA-3'].

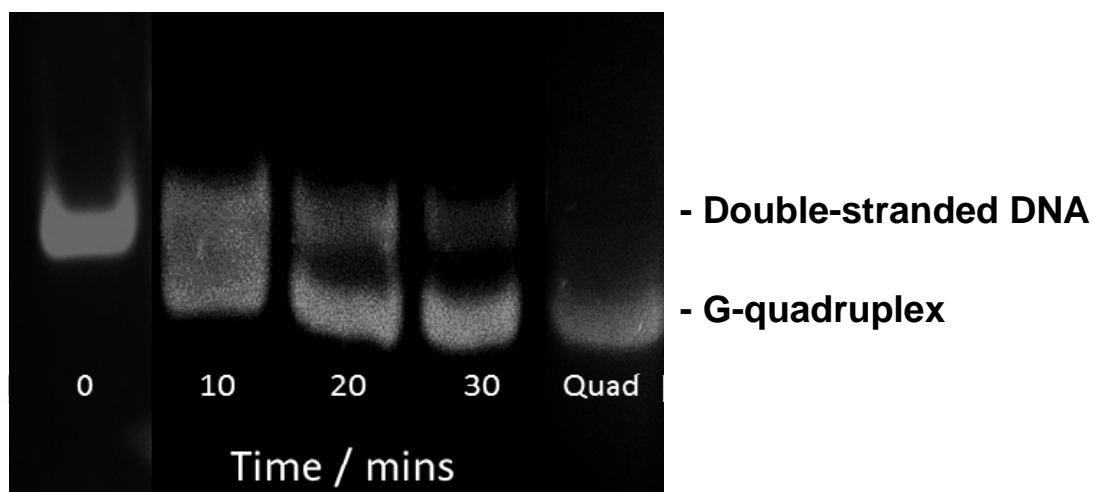

**Figure S7.** Time-course of ExoIII activity. Emission intensity of CV (2  $\mu$ M) with G55 (0.5  $\mu$ M) vs. time in the presence of ExoIII (0, 25, 50, 100 U / mL) at 37  $^{\circ}$ C. Buffer conditions: 10 mM Bis-Tris-Propane-HCl, 10 mM MgCl<sub>2</sub>, 1 mM DTT, 10 mM KCl.

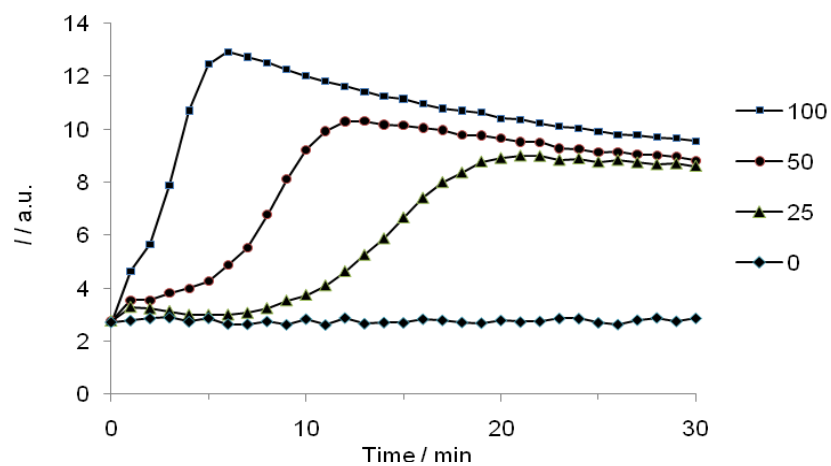

Supplement: NIHMS255331-supplement-1_si_001.pdf [file NIHMS255331-supplement-1_si_001.pdf]
